# Supplementary material
Source: Springer Nature journal article supplement (https://www.springermedizin.de/resource/supplementary/12913_2007_369_MOESM2_ESM.pdf/9535036)
Supplement: MOESM2 [file 9535036]

**1<sup>st</sup> informed consent, screening & baseline measurement (T<sub>0</sub>)**  
**N= 6300** to outpatients of the participating departments who have a specific chronic disease

**Excluded**  
PHQ-9 negative (<15) or no response

**Excluded**  
Suicidal, psychotic, serious mental impairment, delirium, dementia, language problems, drug/alcohol addiction and/or already psychiatric treatment

**MINI interview**  
**N=630**

**Excluded**  
Not meeting DSM-IV criteria for major depressive disorder

**2<sup>nd</sup> informed consent**

**Randomisation**

**Allocated to intervention N=63**

**Allocated to care as usual N=63**

**T<sub>1</sub> questionnaires**  
(3 months)

**T<sub>1</sub> questionnaires**  
(3 months)

**T<sub>2</sub> questionnaires**  
(6 months)

**T<sub>2</sub> questionnaires**  
(6 months)

**T<sub>3</sub> questionnaires**  
(9 months)

**T<sub>3</sub> questionnaires**  
(9 months)

**T<sub>4</sub> questionnaires**  
(12 months)

**T<sub>4</sub> questionnaires**  
(12 months)
